# Supplementary material for: Facility level measurement of off-shore oil & gas installations from a small airborne platform: Method development for quantification and source identification of methane emissions
Source: Copernicus journal article supplement (doi:10.5194/amt-2020-165), 2020-07-02
Supplement: Supplementary file [file amt-2020-165-AC1-supplement.pdf]

We would like to thank the reviewers for their useful and constructive comments regarding the manuscript and have made changes where possible to satisfy their questions and concerns. The original comments from the reviewers are shown in red, with the authors response following in black.

Review comment from Jorg Hacker

I would suggest that you change "small airborne platform" to "medium-sized airborne platform" or similar. Have a look at [airborneresearch.org.au](http://airborneresearch.org.au) to see what "small"(manned airborne platform) means - including for the same type of measurements you are presenting. Apart from that, your paper is great.

Thank you for the positive view of the paper as a whole. The title has been changed to reflect the request made to describe the aircraft as medium sized.
